# Supplementary material for: Efficient and bright green InP quantum dot light-emitting diodes enabled by a self-assembled dipole interface monolayer
Source: Royal Society of Chemistry journal article supplement (doi:10.1039/d2nr06618a), 2023-01-01
Supplement: d2nr06618a1.pdf [file d2nr06618a1.pdf]

# Efficient and bright green InP quantum dots light-emitting diodes enabled by a self-assembled dipole interface monolayer

Lufa Li,<sup>a</sup> Yaning Luo,<sup>a</sup> Qianqian Wu,<sup>a</sup> Lin Wang,<sup>a</sup> Guohua Jia,<sup>b</sup> Tao Chen,<sup>c</sup> Chengxi Zhang,<sup>\*a</sup> Xuyong Yang<sup>\*a</sup>

<sup>a</sup>Key Laboratory of Advanced Display and System Applications of Ministry of Education, Shanghai University, 149 Yanchang Road, Shanghai 200072, China.

Email: [Andrew\\_xiwa@shu.edu.cn](mailto:Andrew_xiwa@shu.edu.cn); [yangxy@shu.edu.cn](mailto:yangxy@shu.edu.cn)

<sup>b</sup>School of Molecular and Life Sciences, Curtin University, Perth, WA 6102, Australia.

<sup>c</sup>Office of Admissions and Career Services, Shanghai University, 99 Shangda Road, Shanghai 200444, China.

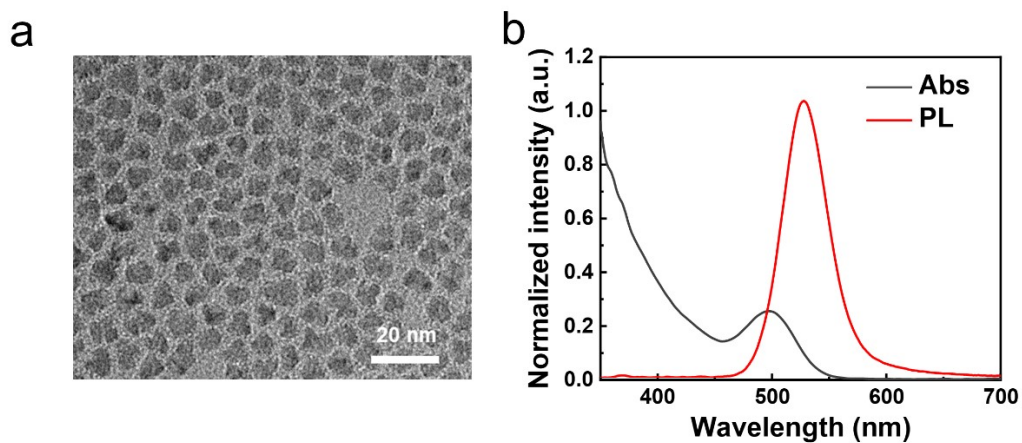

**Figure S1** (a) TEM image and (b) PL & absorption spectra of green InP QDs.

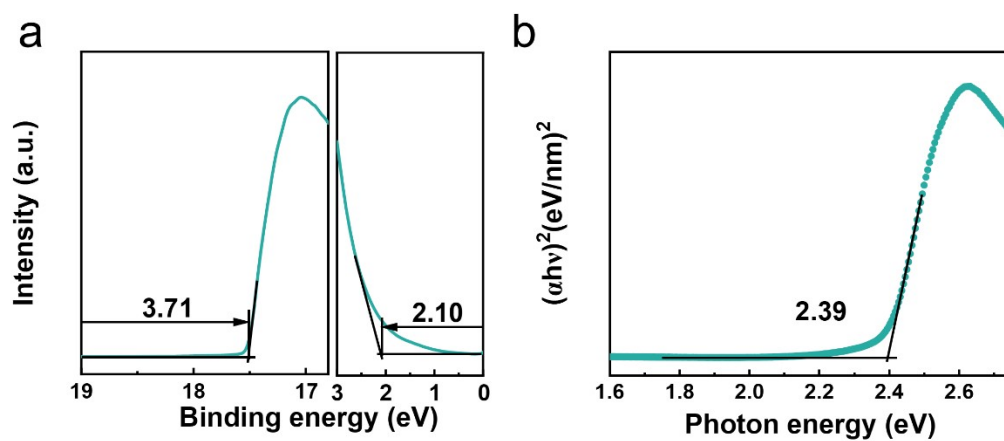

**Figure S2** (a) UPS spectra of the secondary-electron cut-off region and the valence band edge region of InP QDs film. (b) Dependence of  $(\alpha hv)^2$  of InP QDs film upon the incident photon energy ( $hv$ ).

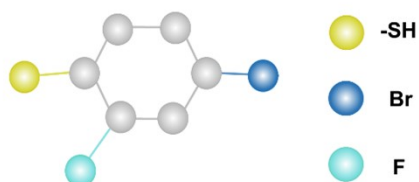

**Figure S3** The BFTP molecular model.

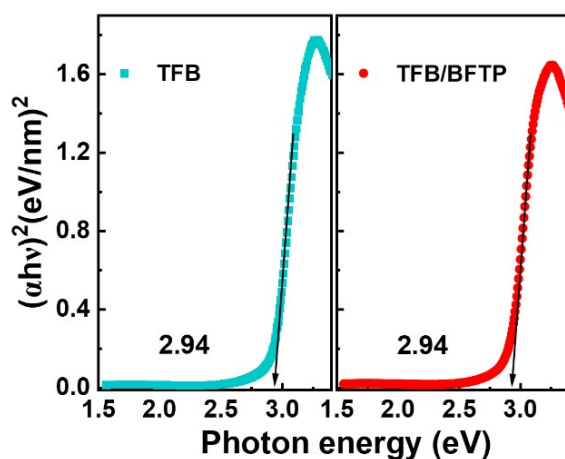

**Figure S4** Dependence of  $(\alpha h\nu)^2$  of TFB and TFB/BFTP films upon the incident photon energy ( $h\nu$ ).

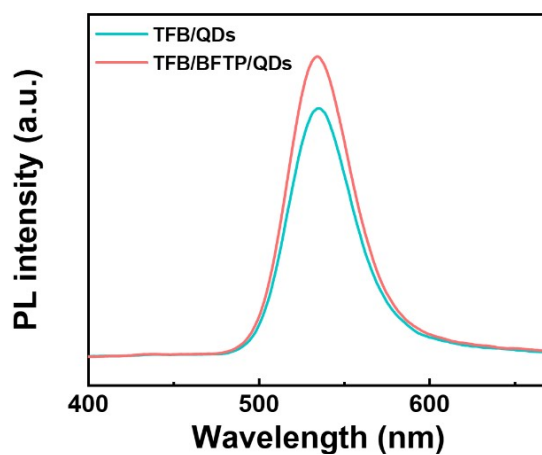

**Figure S5** The PL intensity of InP QDs on TFB and TFB/BFTP films.

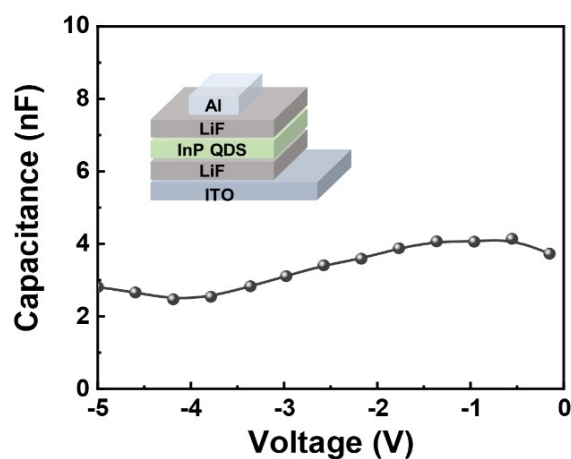

**Figure S6** Relative dielectric constant ( $\epsilon_r$ ) extraction by the capacitance ( $C$ )-voltage ( $V$ ) measurement.

The  $C$ - $V$  curve was measured from the devices with the structure of ITO/LiF (40 nm)/perovskite/LiF(40 nm)/Al. By confirming the  $C$  value of HTL/InP QDs contact interface by the saturated part in the  $C$ - $V$  curve towards negative voltage, we extracted the  $\epsilon_r$  value of the contact interface by the following equation:

$$C = \frac{\epsilon_0 \epsilon_r S}{d}$$

where  $\epsilon_0$ ,  $S$  and  $d$  represent vacuum permittivity, device area and thickness of the QDs film, respectively. The  $\epsilon_r$  value was estimated to be 12.17.

The trap state density ( $n_{traps}$ ) was determined using the trap-filled limit voltage equation:

$$n_{traps} = \frac{2\epsilon_0 \epsilon_r V_{TFL}}{ed^2}$$

where  $V_{TFL}$  is the intersection voltage of the trap-filled limit and ohmic regime, and  $e$  is the elemental charge.

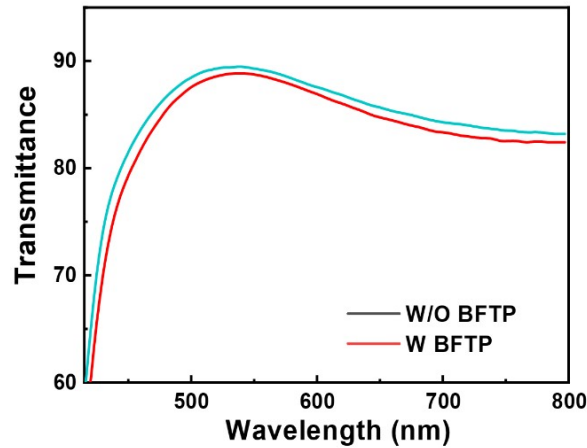

**Figure S7** Transmittance spectra for TFB (W/O BFTP) and TFB/BFTP (W BFTP) films on ITO substrate.

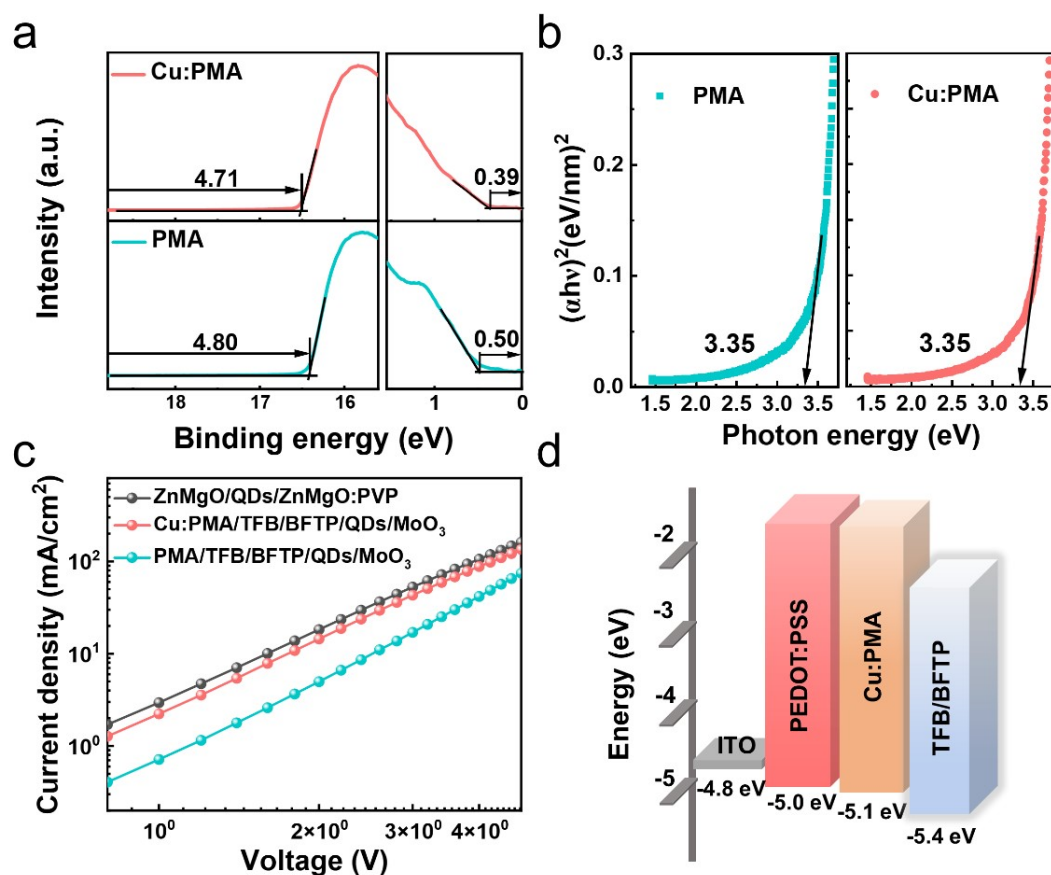

**Figure S8** (a) UPS spectra of the secondary-electron cut-off region and the valence band edge region of PMA and Cu: PMA films deposited on ITO substrate. (b) Dependence of  $(\alpha h\nu)^2$  of PMA and Cu: PMA films upon the incident photon energy ( $h\nu$ ). (c)  $J-V$  characteristics for the electron-only device with a structure of ITO/ZnMgO/QDs/ZnMgO:PVP/Al and the hole-only devices with a structure of ITO/PMA or Cu: PMA/TFB/BFTP/QDs/MoO<sub>3</sub>/Al. (d) The band alignment diagram of PEDOT: PSS, Cu: PMA and TFB/BFTP layers.

**Table S1** Summary of the device performance of QLEDs without treatment (pristine), with BFTP, with Cu:PMA & BFTP.

| Sample            | V <sub>on</sub> (V) | Peak EQE (%) | Peak Lum (cd/m <sup>2</sup> ) |
|-------------------|---------------------|--------------|-------------------------------|
| pristine          | 2.5                 | 3.71         | 1792                          |
| PEDOT:PSS/TFB/BFT | 1.8                 | 8.13         | 14085                         |
| P                 |                     |              |                               |
| Cu:PMA/TFB/BFTP   | 1.8                 | 8.46         | 18356                         |

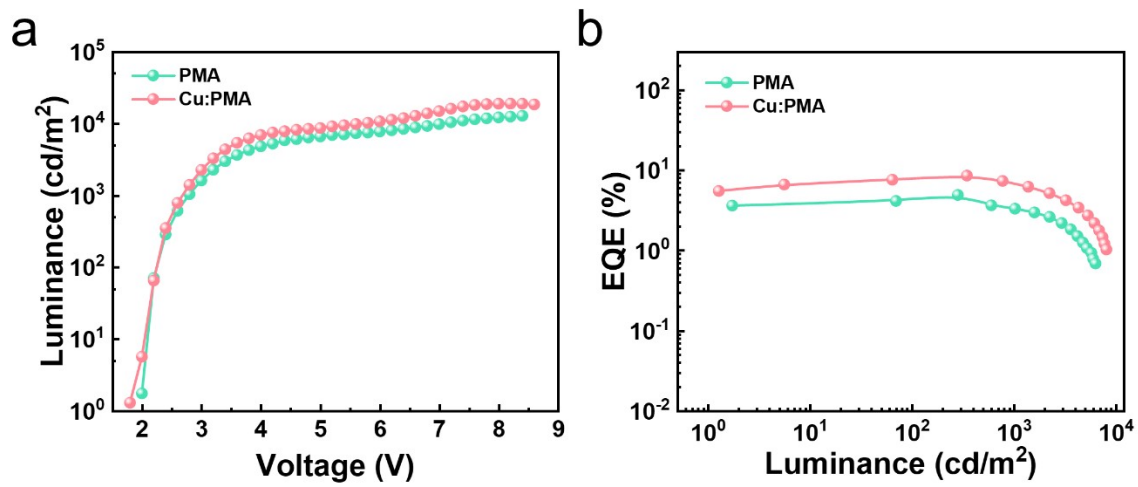

**Figure S9** (a)  $L$ - $V$  and (b)  $EQE$ - $L$  characteristics of PEDOT:PSS-based and Cu:PMA-based QLEDs.

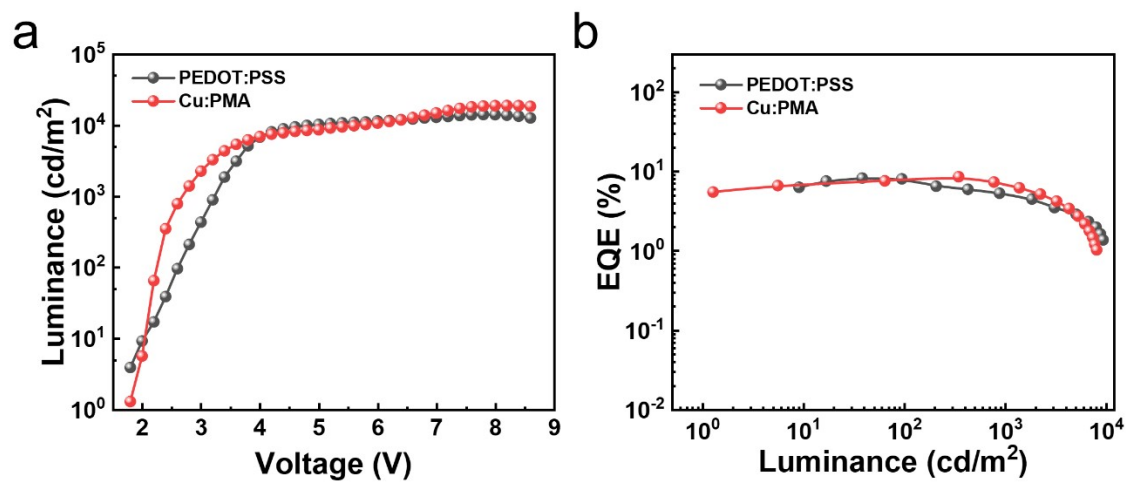

**Figure S10** (a)  $L$ - $V$  and (b)  $EQE$ - $L$  characteristics of PEDOT:PSS-based and Cu:PMA-based QLEDs.

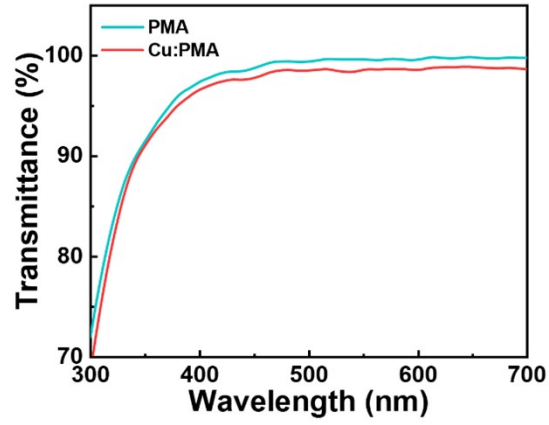

**Figure S11** Transmittance spectra for the PMA and Cu: PMA films.

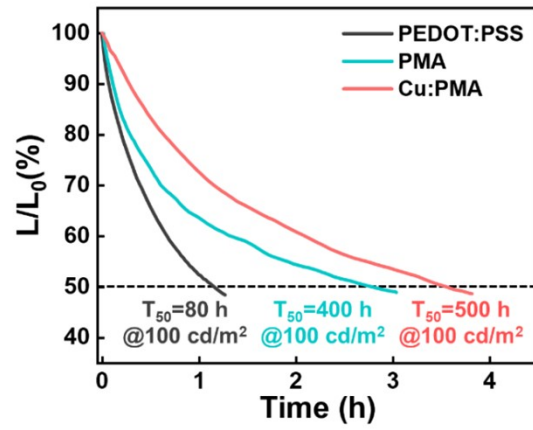

**Figure S12** Operational lifetimes of BFTP-based QLEDs with different hole injection layers (PEDOT: PSS, PMA and Cu: PMA HILs).
